# Supplementary material for: Individual changes in neurocognitive functioning and health-related quality of life in patients with brain oligometastases treated with stereotactic radiotherapy
Source: PubMed Central journal article supplement (PMC6096889; doi:10.1007/s11060-018-2868-7), 2018-04-16
Supplement: 11060_2018_2868_MOESM1_ESM.pdf [file 11060_2018_2868_MOESM1_ESM.pdf]

## Supplementary material

### **Individual changes in neurocognitive functioning and health-related quality of life in patients with brain oligometastases treated with stereotactic radiotherapy**

Pim B. van der Meer, Esther J.J. Habets, Ruud G. Wiggeraad, Antoinette Verbeek-de Kanter, Geert J. Lycklama à Nijeholt, Hanneke Zwinkels, Martin Klein, Linda Dirven, Martin J.B Taphoorn

#### **Content:**

**Supplementary Table 1** Neurocognitive domain and the corresponding neurocognitive test(s)

**Supplementary Table 2** Compliance with NCF and HRQoL assessments

**Supplementary Table 3** Changes in KPS scores from baseline - 3 months and 3 - 6 months, with respect to changes in NCF and HRQoL at patient level

**Supplementary Fig. 1** Changes in neurocognitive functioning (NCF) scores, using a change in z-score of  $\geq 1.0$  SD, at domain level calculated from **a** baseline - 3 months and **b** 3 - 6 months, and **c** patient level

**Supplementary Table 1** Neurocognitive domain and the corresponding neurocognitive test(s)

| Neurocognitive domain        | Neurocognitive test(s)                                                                                                                                                   |
|------------------------------|--------------------------------------------------------------------------------------------------------------------------------------------------------------------------|
| Verbal memory                | Rey Auditory Verbal Learning Test (immediate recall, delayed recall and delayed recognition)[26]                                                                         |
| Visual memory                | Rey Complex Figure Test (copying and delayed recall)[31]                                                                                                                 |
| Attention                    | Stroop Color-Word Test[24]<br>Digit Span forward and backward, a subtest of Wechsler Adult Intelligence Scale III[27]                                                    |
| Executive functioning        | Concept Shifting Test[28]<br>Word fluency (category and letter fluency)[24]<br>Key-search test, a subtest of the behavioural Assessment of the Dysexecutive Syndrome[29] |
| Working memory               | Digit Span forward and backward, a subtest of Wechsler Adult Intelligence Scale III[27]                                                                                  |
| Information processing speed | Stroop Color-Word Test[24]<br>Letter Digit Substitution Test[24]                                                                                                         |
| Visuoconstruction            | Rey Complex Figure Test (copying and delayed recall)[31]                                                                                                                 |

**Supplementary Table 2** Compliance with NCF and HRQoL assessments

|                          | No. of Forms/<br>Assessments<br>Expected <sup>a</sup> | No. of forms completed/ Assessments performed |          |
|--------------------------|-------------------------------------------------------|-----------------------------------------------|----------|
|                          |                                                       | NCF                                           | HRQoL    |
| Baseline                 | 55                                                    | 50 (91%)                                      | 54 (98%) |
| 3 months                 | 55                                                    | 38 (69%)                                      | 51 (93%) |
| 6 months                 | 48                                                    | 27 (56%)                                      | 41 (85%) |
| Baseline, 3 and 6 months | 48                                                    | 23 (48%)                                      | 37 (77%) |

<sup>a</sup>Based on alive participating patients, NCF = neurocognitive functioning, HRQoL = health-related quality of life

**Supplementary Table 3** Changes in KPS scores from baseline - 3 months and 3 - 6 months, with respect to changes in NCF and HRQoL at patient level

|                | Changes in KPS scores (0-3 months, n=36; 3-6 months, n=24) |            |            |            |             |            |
|----------------|------------------------------------------------------------|------------|------------|------------|-------------|------------|
|                | Deterioration                                              |            | Stable     |            | Improvement |            |
|                | 0-3 months                                                 | 3-6 months | 0-3 months | 3-6 months | 0-3 months  | 3-6 months |
| NCF, No. (%)   |                                                            |            |            |            |             |            |
| Decline        | 1 (3)                                                      | 1 (4)      | 3 (8)      | 5 (21)     | 1 (3)       | 2 (8)      |
| Both           | 1 (3)                                                      | 0 (0)      | 0 (0)      | 0 (0)      | 1 (3)       | 1 (4)      |
| Stable         | 14 (39)                                                    | 4 (17)     | 6 (17)     | 6 (25)     | 4 (11)      | 2 (8)      |
| Improvement,   | 1 (3)                                                      | 0 (0)      | 1 (3)      | 2 (8)      | 3 (8)       | 1 (4)      |
| HRQoL, No. (%) |                                                            |            |            |            |             |            |
| Decline        | 10 (20)                                                    | 4 (11)     | 0 (0)      | 4 (11)     | 1 (2)       | 0 (0)      |
| Both           | 15 (30)                                                    | 6 (16)     | 12 (24)    | 13 (34)    | 5 (10)      | 3 (8)      |
| Stable         | 1 (2)                                                      | 1 (3)      | 0 (0)      | 0 (0)      | 0 (0)       | 0 (0)      |
| Improvement    | 0 (0)                                                      | 0 (0)      | 1 (2)      | 3 (8)      | 5 (10)      | 4 (11)     |

KPS = Karnofsky Performance Status, NCF = neurocognitive functioning, HRQoL = health-related quality of life

Note: Due to rounding, not all percentages add up to 100%

**Supplementary Fig. 1** Changes in neurocognitive functioning (NCF) scores, using a change in z-score of  $\geq 1.0$  SD, at domain level calculated from **a** baseline - 3 months and **b** 3 - 6 months, and **c** patient level. VeM, verbal memory; ViM, visual memory; AT, attention; EF, executive functioning; WM, working memory; IPS, information processing speed; VC, visuoconstruction

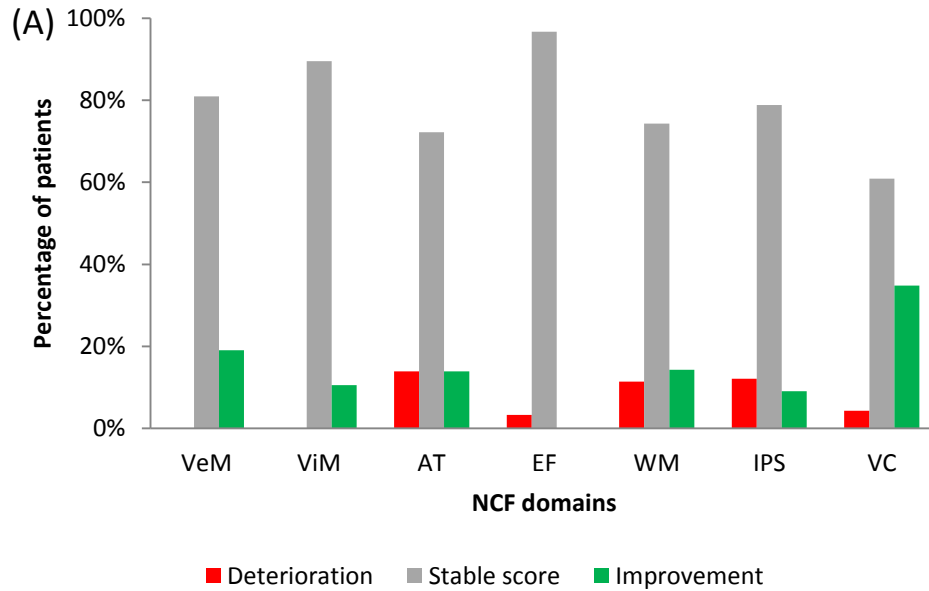

Number of patients at domain level, baseline - 3 months

|               | VeM | ViM | AT | EF | WM | IPS | VC |
|---------------|-----|-----|----|----|----|-----|----|
| Deterioration | 0   | 0   | 5  | 1  | 4  | 4   | 1  |
| Stable score  | 17  | 17  | 26 | 29 | 26 | 26  | 14 |
| Improvement   | 4   | 2   | 5  | 0  | 5  | 3   | 8  |

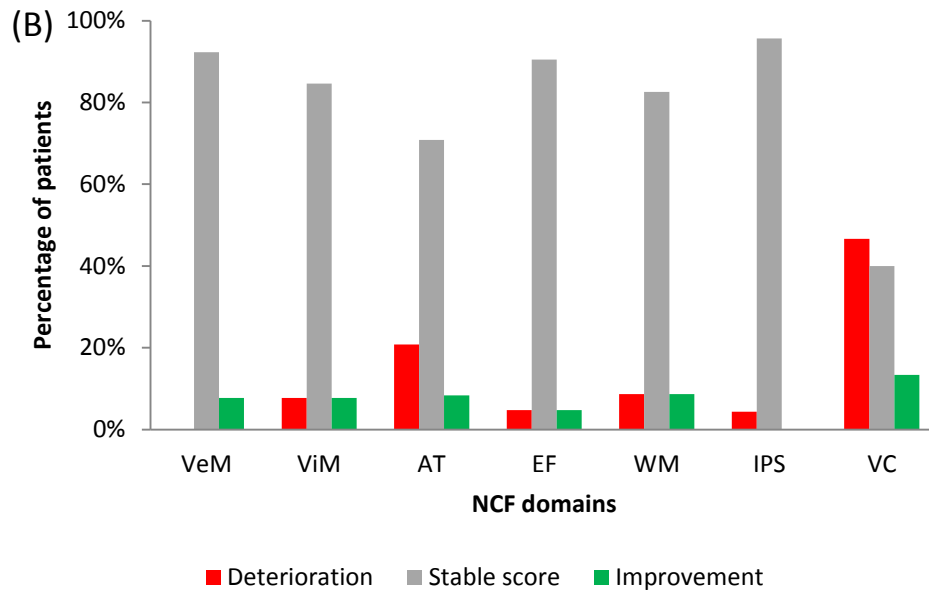

Number of patients at domain level, 3 - 6 months

|               | <b>VeM</b> | <b>ViM</b> | <b>AT</b> | <b>EF</b> | <b>WM</b> | <b>IPS</b> | <b>VC</b> |
|---------------|------------|------------|-----------|-----------|-----------|------------|-----------|
| Deterioration | 0          | 1          | 5         | 1         | 2         | 1          | 7         |
| Stable score  | 12         | 11         | 17        | 19        | 19        | 22         | 6         |
| Improvement   | 1          | 1          | 2         | 1         | 2         | 0          | 2         |

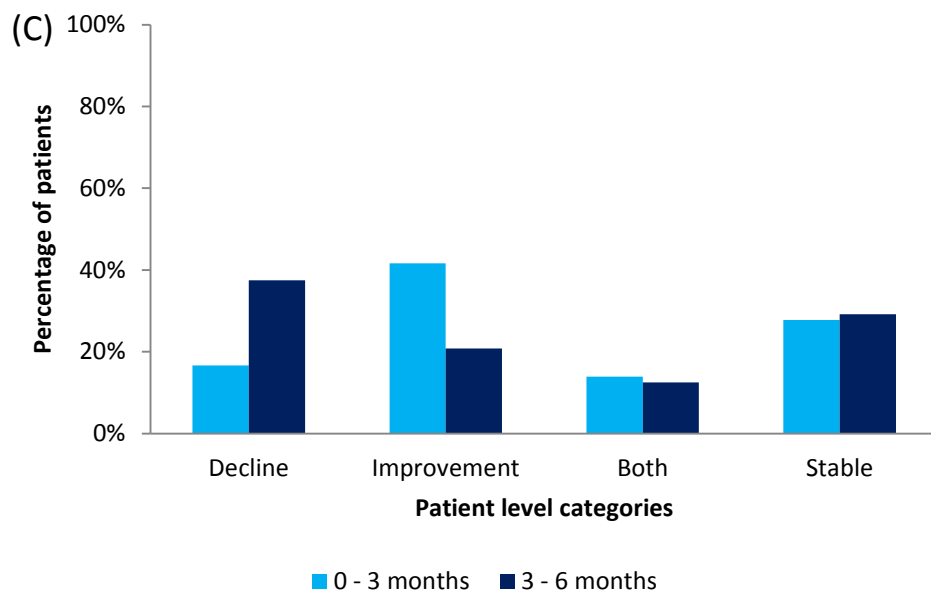

Number of patients at patient level (NCF)

|              | <b>Decline</b> | <b>Improvement</b> | <b>Both</b> | <b>Stable</b> |
|--------------|----------------|--------------------|-------------|---------------|
| 0 - 3 months | 6              | 15                 | 5           | 10            |
| 3 - 6 months | 9              | 5                  | 3           | 7             |
